# Supplementary material
Source: publisher figshare collection journal article supplement (https://acs.figshare.com/ndownloader/files/34360741)
Supplement: Supplementary file 1 [file 34360741]

## Supplementary Information Cover Page

### **Exposing the Brain Proteomic Signatures of Alzheimer's Disease in Diverse Racial Groups: Leveraging Multiple Datasets and Machine Learning**

**Heather Desaire<sup>1\*</sup>, Kaitlyn E. Stepler<sup>2</sup>, and Renã A. S. Robinson<sup>2-6\*</sup>**

<sup>1</sup>Department of Chemistry, University of Kansas, Lawrence, Kansas 66045, United States

<sup>2</sup>Department of Chemistry, Vanderbilt University, Nashville, TN 37235, United States

<sup>3</sup>Vanderbilt Memory and Alzheimer's Center, Vanderbilt University Medical Center, Nashville, TN 37212, United States

<sup>4</sup>Vanderbilt Institute of Chemical Biology, Vanderbilt University, Nashville, TN 37232, United States

<sup>5</sup>Vanderbilt Brain Institute, Vanderbilt University, Nashville, TN 37232, United States

<sup>6</sup>Department of Neurology, Vanderbilt University Medical Center, Nashville, TN 37232, United States

\*Correspondence to: Heather Desaire, phone: 785-864-3015, Email: [hdesaire@ku.edu](mailto:hdesaire@ku.edu) or Renã AS Robinson, 615-343-0129, Email: [rena.as.robinson@vanderbilt.edu](mailto:rena.as.robinson@vanderbilt.edu)

Supplementary Information

**Supplementary Table 1.** Data by XGBoost (provided as separate excel file)
